# Supplementary material for: Supramolecular polymeric micelles as high performance electrochemical materials
Source: Royal Society of Chemistry journal article supplement (doi:10.1039/c5tc02130h), 2015-01-01
Supplement: c5tc02130h1.pdf [file c5tc02130h1.pdf]

## Supporting Information

### Supramolecular Polymeric Micelles as High Performance Electrochemical Materials

Chih-Chia Cheng,<sup>a\*</sup> Feng-Chih Chang,<sup>b</sup> Fu-Hsiang Ko,<sup>c</sup> Feng-Chun Yu,<sup>b</sup> Yen-Ting Lin,<sup>c</sup> Yeong-Tarng Shieh,<sup>d</sup> Jem-Kun Chen,<sup>e</sup> Duu-Jong Lee<sup>f,g</sup>

<sup>a</sup> Graduate Institute of Applied Science and Technology, National Taiwan University of Science and Technology, Taipei 10607, Taiwan. E-mail: [cccheng@mail.ntust.edu.tw](mailto:cccheng@mail.ntust.edu.tw)

<sup>b</sup> Institute of Applied Chemistry, National Chiao Tung University, Hsin Chu 30050, Taiwan.

<sup>c</sup> Department of Materials Science and Engineering, National Chiao Tung University, Hsinchu, 30050, Taiwan.

<sup>d</sup> Department of Chemical and Materials Engineering, National University of Kaohsiung, Kaohsiung 81148, Taiwan.

<sup>e</sup> Department of Materials Science and Engineering, National Taiwan University of Science and Technology, Taipei 10607, Taiwan.

<sup>f</sup> Department of Chemical Engineering, National Taiwan University, Taipei 10617, Taiwan.

<sup>g</sup> Department of Chemical Engineering, National Taiwan University of Science and Technology, Taipei 10607, Taiwan.

### Experimental Section

#### Materials

All chemicals were purchased from Sigma-Aldrich (USA) at the highest purity grade available. All solvents were purchased from TEDIA (USA) and distilled over calcium hydride prior to use.

#### Characterizations

**Nuclear Magnetic Resonance (NMR) measurement.** <sup>1</sup>H-NMR spectra were recorded using a Varian Inova- 400 MHz spectrometer equipped with a 9.395 T Bruker magnet. Samples of ca. 10 mg were analyzed at 25 °C in deuterated solvent. <sup>13</sup>C-NMR spectra were performed on a Varian Inova- 400 MHz spectrometer operated at 100 MHz. All samples of ca. 30 mg were dissolved in deuterate solvent and analyzed at 25 °C

**Fourier Transform Infrared (FT-IR) spectra** were obtained from Nicolet Avatar 320 FT-IR spectrometer; 32 scans were collected with a spectral resolution of 1.0 cm<sup>-1</sup>. The conventional KBr disk method was employed. Sample was dissolved in DMSO and then cast onto a KBr disk and dried in vacuum at 120 °C for 24 h. The variable temperature experiments were scanned from 30 to 150 °C at a rate of 3.0 °C/min.

**Gas Chromatography/Mass Spectrometry.** GC/MS spectra were obtained with Micromass Trio 2000 mass spectrometer (Micromass, Manchester, UK).

**Differential Scanning Calorimetry (DSC).** DSC instrument (TA Instruments Q-20) was used to perform thermal analysis. Samples of ca. 5 mg were sealed in an aluminum pan, and then heated from 30 to 200 °C at a rate of 10 °C/min.

**Matrix-Assisted Laser Desorption/Ionization Time-of-Flight Mass Spectroscopy (MALDI-TOF MS).** MALDI-TOF MS was performed on a Bruker Autoflex II instrument equipped with an ultraviolet-light nitrogen laser ( $\lambda = 337$  nm).

**UV-Vis and Photoluminescence (PL) Spectra.** Ultraviolet-Visible (UV-Vis) and photoluminescence (PL) spectra were measured using a Hewlett Packard Model diode-array spectrophotometer and a Hitachi F-4500 luminescence spectrometer, respectively.

**Cyclic voltammetry (CV) measurements** were performed using a Bioanalytical Systems (BAS 100 W, USA) electrochemical analyzer operated at a scan rate of  $100 \text{ mV s}^{-1}$ . The potentials were measured against an Ag/Ag<sup>+</sup> (0.01 M AgNO<sub>3</sub>) reference electrode using ferrocene/ferrocenium (Fc/Fc<sup>+</sup>) as an internal standard.

**Elemental Analysis (EA).** The carbon, hydrogen, and nitrogen contents of the samples were obtained using a CHN-O-Rapid elemental analyzer (Foss. Heraeus, Germany).

**Dynamic Light Scattering (DLS).** DLS measurements were conducted using a 90Plus laser particle size analyzer (Brookhaven Instruments Corp., USA), which was calibrated using a 60-nm latex standard. The scattering from a small amount of sample dissolved in DMSO was measured at  $90^\circ$ .

**X-ray photoelectron spectra (XPS).** XPS results were obtained with a PHI Quantera SXM electron spectrometer from ULVAC-PHI using Al K $\alpha$  x-ray source. The base pressure was about  $5 \times 10^{-10}$  torr.

**Raman spectra** were acquired using a WITec, Inc. (Ulm, Germany) Model CRM 2000 Confocal Raman Microscope. A spectral range of  $220\text{-}3200 \text{ cm}^{-1}$  was employed. The excitation source was an internal He-Ne (632 nm) laser with a power density of ca.  $3 \times 10^4 \text{ W/cm}^2$ . Sample preparation for Raman test was spin-coated onto a piece ( $10 \times 10 \text{ mm}^2$ ) of Si wafer surface.

**Transmission Electron Microscopy (TEM).** TEM images were recorded using an FEI T12 transmission electron microscope with a low-energy electron beam (120 keV). Test samples were placed on a carbon-coated copper grid.

**Atomic Force Microscopy (AFM).** AFM images were scanned in tapping mode (Digital Instrument NS4/D3100CL/MultiMode) using silicon cantilevers in the air at  $25^\circ \text{C}$ . AFM images of all samples were spin-coated onto a wafer substrate and then annealed at  $120^\circ \text{C}$ .

**Device Fabrication and Measurement:** Metal-insulator-semiconductor-type memory devices were fabricated in the configuration wafer/silicon dioxide (SiO<sub>2</sub>, 200 nm)/ ESTL (PAT/PCBM, 30 nm)/ Zinc oxide (ZnO, 50 nm)/Aluminum (Al, 100 nm). The SiO<sub>2</sub> layer was used as an insulator layer to balance electron transfers. The ZnO layer deposited through a spin-coating process was employed as an active channel layer, then capped with Al metal through thermal evaporation at a rate of  $4.0 \text{ \AA s}^{-1}$ . The electrical result of current-voltage (I-V) characteristic of metal-insulator-semiconductor device was performed using an Agilent-4156 probe station and an HP-4284 capacitance-voltage (C-V) analyzer, respectively. Note that all of the experiments were performed in air or in a standard fume hood.

**Syntheses:**

## Synthesis of adenine-functionalized thiophene monomer

3-Bromohexylthiophene was synthesized from commercial PEG 1000 according to the procedures described in previous work.<sup>20</sup> 3-Bromohexylthiophene (2.79 g, 20.0 mmol) and anhydrous potassium carbonate (5.58 g, 40.0 mmol) were added to a solution of adenine (5.40 g, 40.0 mmol) in DMF and then the resulting suspension was stirred at 60 °C for 36 h. The insoluble material obtained was filtrated out, washed with water, and recrystallized twice from toluene. Yield: 2.52 g (45%); FAB-MS:  $m/z$  (%) = 302; <sup>1</sup>H NMR (400 MHz, CDCl<sub>3</sub>):  $\delta$  = 1.34 (m, 4H), 1.65 (br, 2H), 2.60 (m, 2H), 3.68 (t, 2H), 5.65 (d, 1H), 6.89 (d, 1H), 7.08 (d, 1H), 7.21 (d, 1H), 8.80 (s, 1H). <sup>13</sup>C NMR (400 MHz, CDCl<sub>3</sub>)  $\delta$  = 26.45, 28.96, 29.19, 30.30, 30.49, 49.06, 102.34, 120.17, 125.45, 128.40, 142.96, 144.65, 151.15, 164.18.

## Synthesis of a polythiophene containing pendant adenine groups (PAT)

Adenine-functionalized thiophene (1.73 g, 5.7 mmol) and anhydrous FeCl<sub>3</sub> (9.31 g, 57.4 mmol) was dissolved in dry chloroform (40 mL) and then solution was purged with dry argon for 10 min. The solutions were degassed through three freeze/thaw evacuation cycles. Subsequently, the mixture was reacted for 1 day at room temperature and poured into methanol (200 mL) to precipitate the polymer. The crude polymer was filtered, further purified by extraction in a Soxhlet extractor with refluxing methanol for 48 h, and dried under vacuum, Yield: 1.08 g (63%). <sup>1</sup>H NMR (400 MHz, *d*<sub>6</sub>-DMSO):  $\delta$  = 1.20 (4H), 1.53(2H), 1.71 (2H), 2.65 (2H), 4.05 (2H), 7.07 (1H), 7.20 (2H), 8.08 (2H)

## Preparation of PCBM-Loaded Micelles

The PAT was used to encapsulate PCBM via simple solvent blending method. PCBM (ranging from 10 to 40 mg) was mixed with 20 mg of PAT in 5 mL DMSO under stirring at 100 °C for 1 day, and then cooled down to room temperature. Un-encapsulated PCBM was separated by the procedure of filtration through a 0.45  $\mu$ m PTFE filter. The amount of the encapsulated PCBM in micelles was analyzed by a UV-visible absorption spectroscopy at 329 nm for PBCM. The PBCM-loading content was determined by using the following expressions:

$$\text{loading content (\%)} = W_t/W_s \times 100\%$$

where,  $W_t$ , weight of PBCM that loaded into Micelles;  $W_s$ , weight of PCBM-loaded micelle after filtration.

**Table S1.** PCBM Loading of PCBM Loaded PAT micelles

| PAT/PCBM ratio (wt/wt) | PCBM loading content (%) |
|------------------------|--------------------------|
| 1:0.5 (20mg: 10mg)     | 23.3                     |
| 1:1.0 (20mg: 20mg)     | 31.5                     |
| 1:2.0 (20mg: 40mg)     | 33.6                     |

**Table S2.** Electrical properties of PAT/PCBM-based devices.

| Sample         | Conductivity (mS cm <sup>-1</sup> ) <sup>a</sup> |
|----------------|--------------------------------------------------|
| PCBM           | 4.95 x 10 <sup>-6</sup>                          |
| 35/65 PAT/PCBM | 2.85 x 10 <sup>-10</sup>                         |
| PAT            | NA                                               |

a.. Electrical conductivity was measured by the four-point probe method at room temperature.

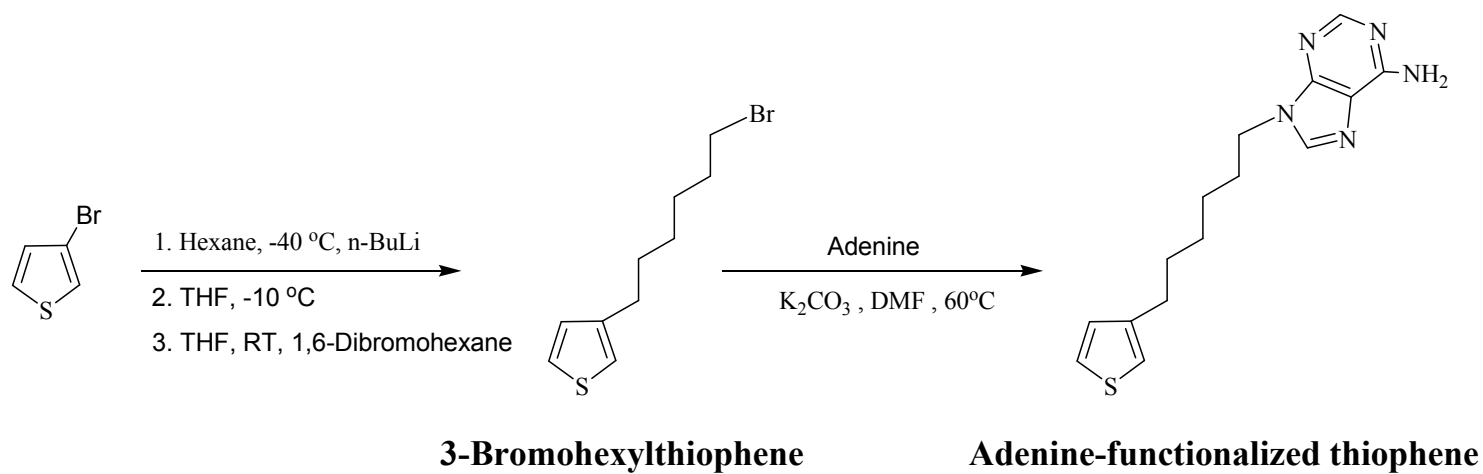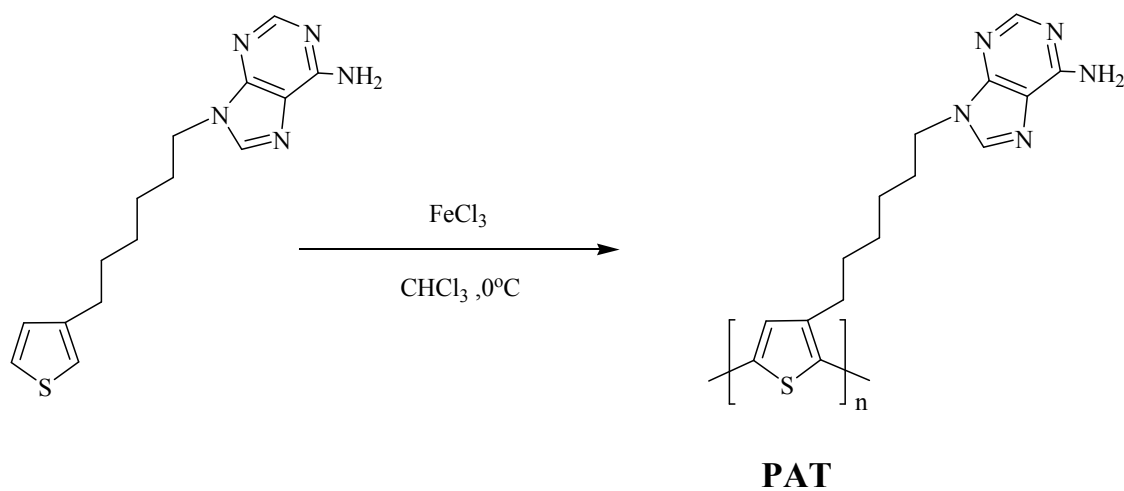

**Scheme S1.** Syntheses of adenine-functionalized thiophene and PAT.

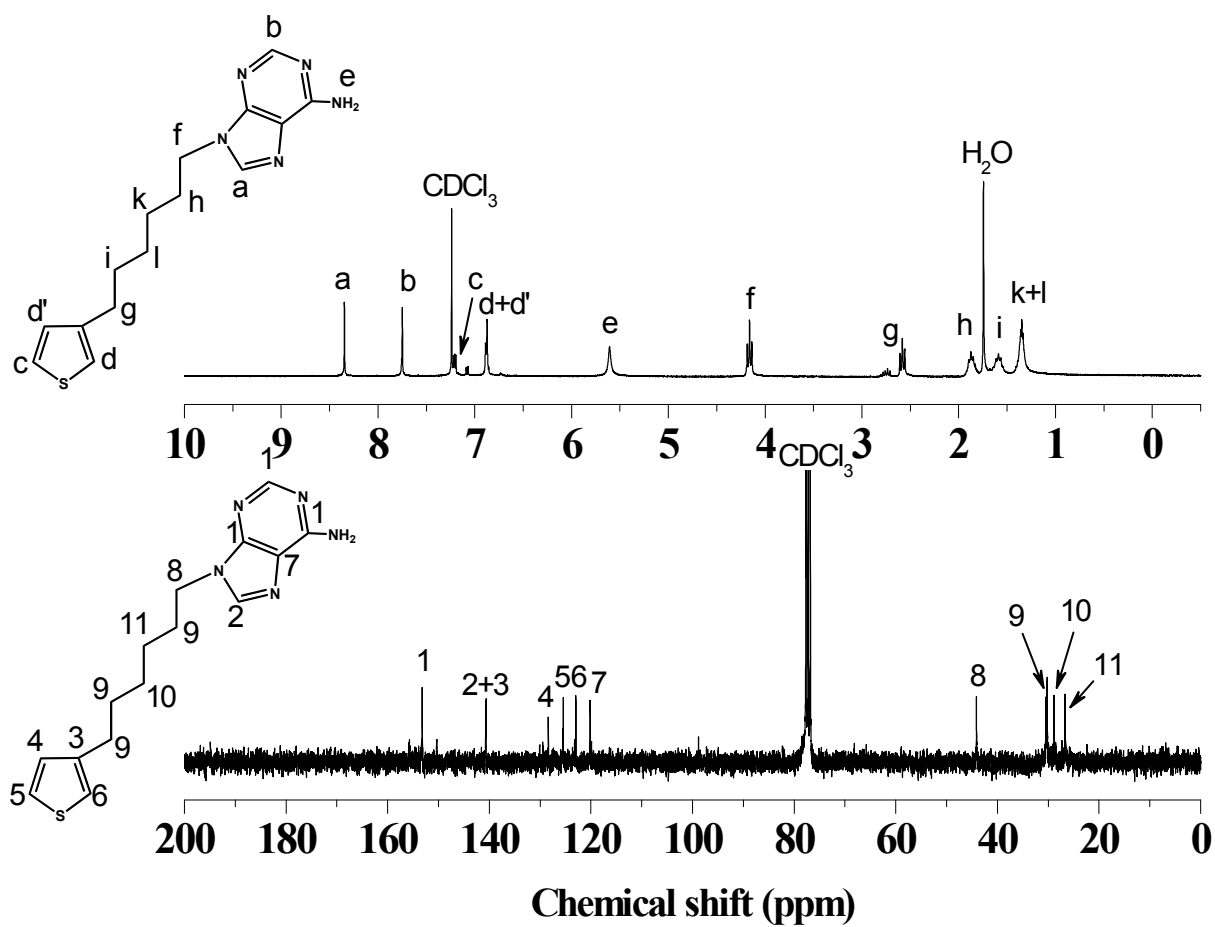

**Fig. S1**  $^1\text{H-NMR}$  and  $^{13}\text{C-NMR}$  spectra of adenine-functionalized thiophene in  $\text{CDCl}_3$ .

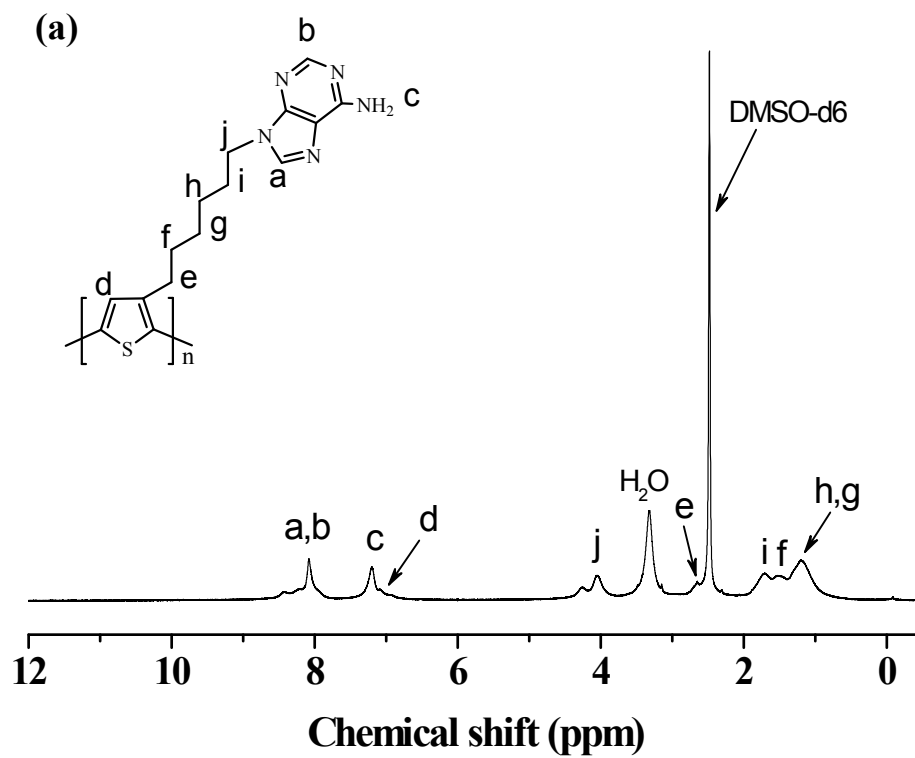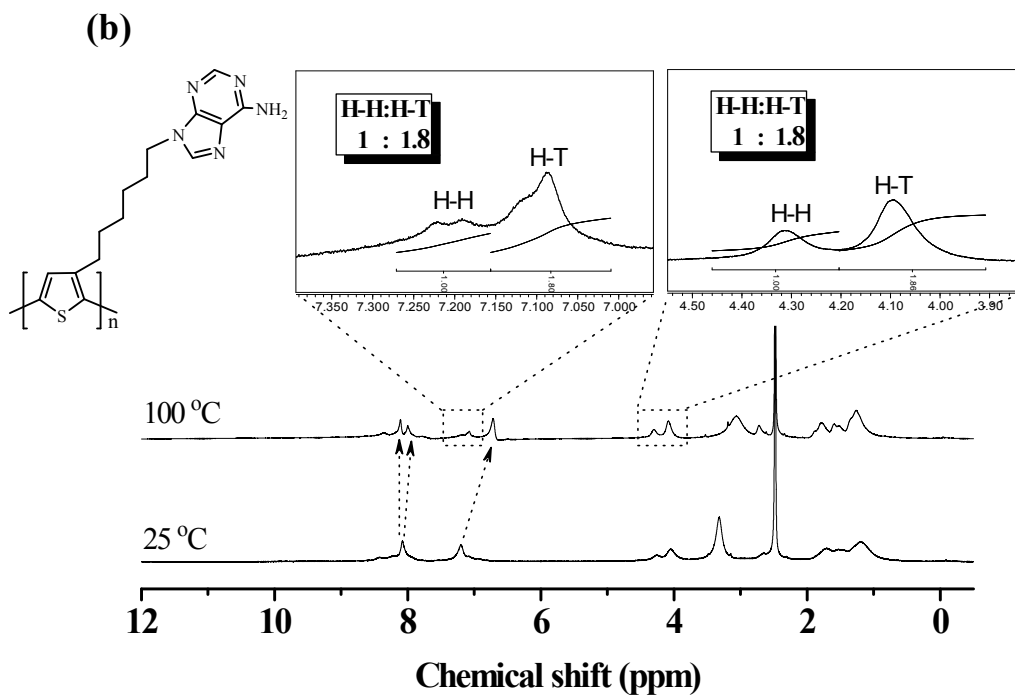

Fig. S2 <sup>1</sup>H-NMR spectrum of PAT in *d*<sub>6</sub>-DMSO.

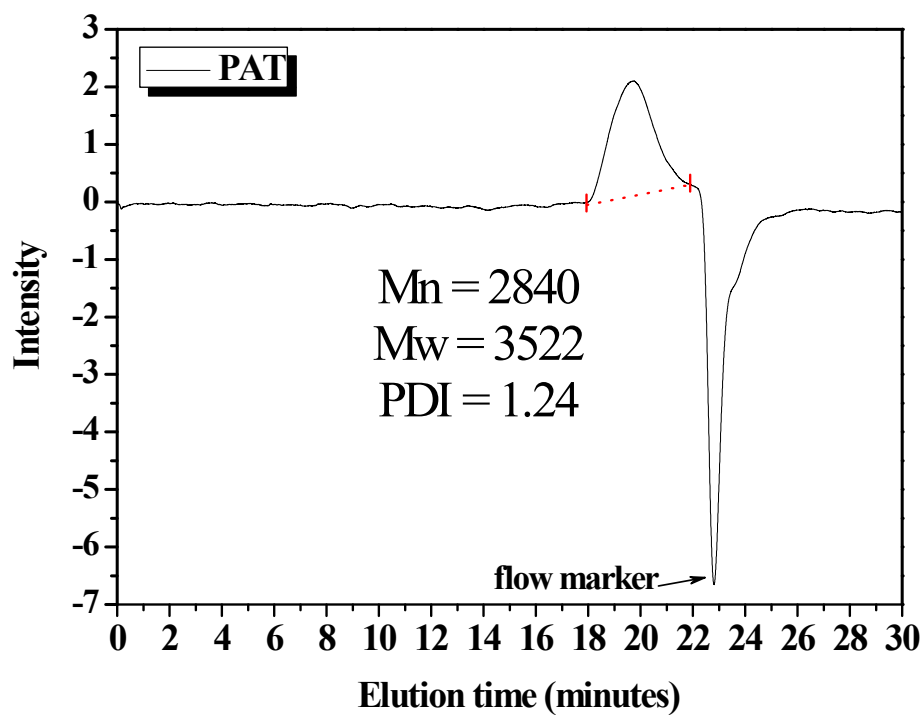

Fig. S3 GPC traces of PAT using DMF as eluent.

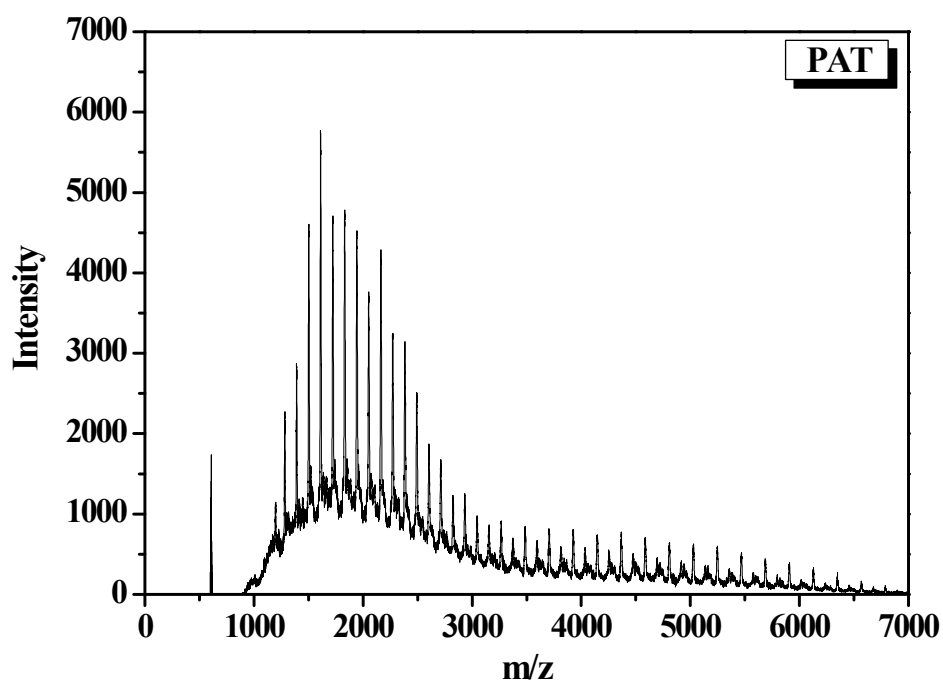

Fig. S4 MALDI-TOF mass spectrum of PAT.



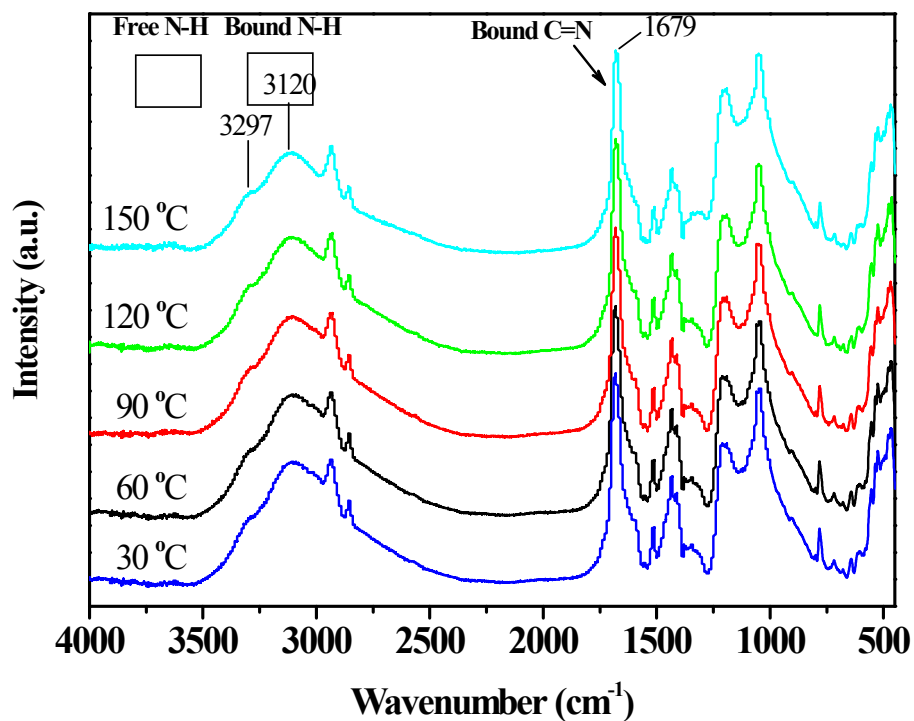

Fig. S5 Variable-temperature FT-IR spectra of PAT presented in the range 500–4000 cm<sup>-1</sup>

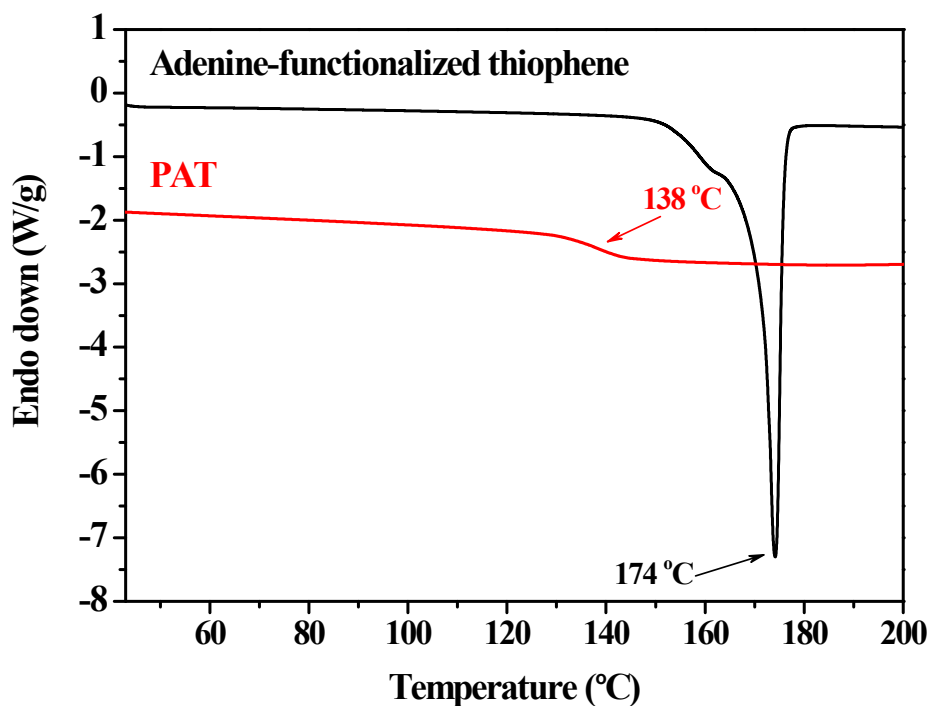

Fig. S6 DSC curves of adenine-functionalized thiophene and PAT.

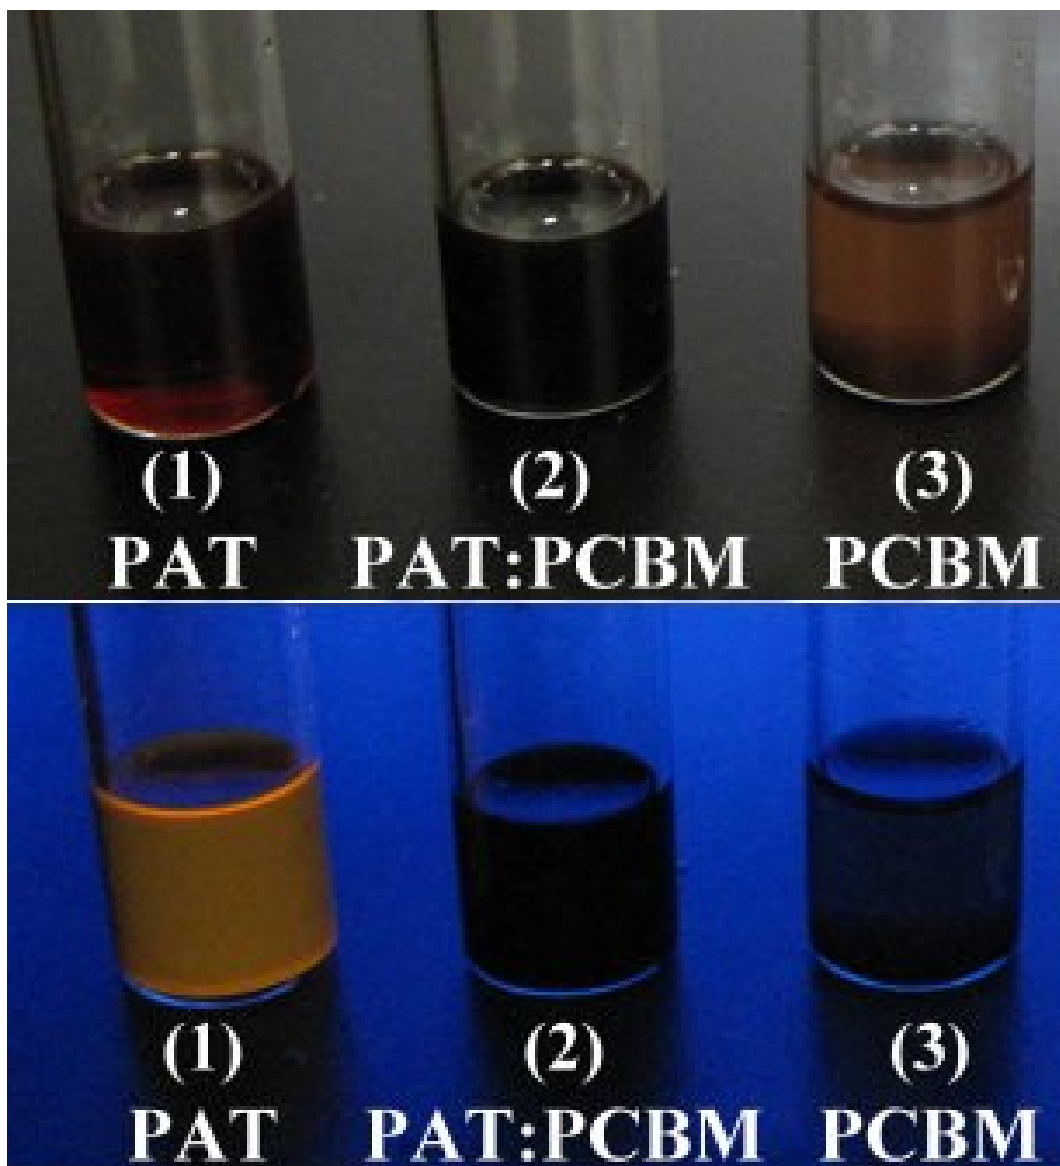

**Fig. S7** Enlarged image of **Figure 1(c)**: Comparison of solubility characteristics by the digital photographs between PAT, PAT/PCBM and PCBM in DMSO, simultaneously exposed under natural light (upper panel) and UV lamp illumination (lower panel).

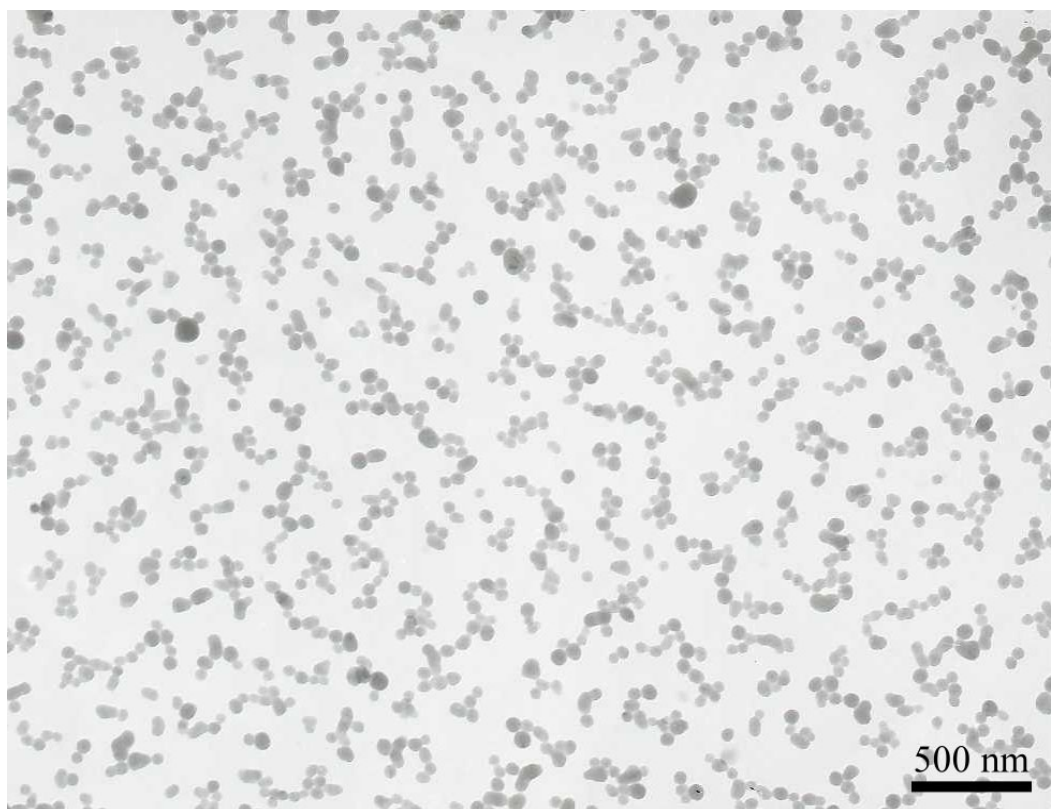

**Fig. S8** TEM image of PAT on carbon coated copper grid. The sample was drop-cast from a DMSO solution onto the TEM grid.

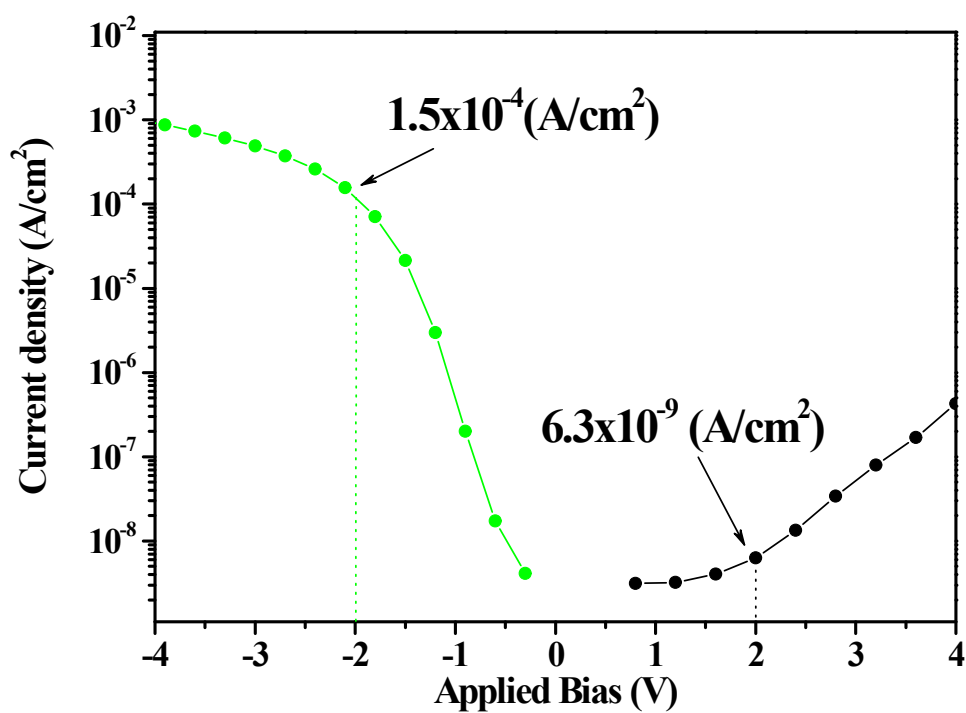

**Fig. S9** Enlarged part of the low-voltage region in **Figure 4(c)**.
